# Supplementary material
Source: PubMed Central journal article supplement (PMC7308049)
Supplement: jciinsight-5-131834-s155.pdf [file jciinsight-5-131834-s155.pdf]

# SUPPLEMENTARY MATERIALS

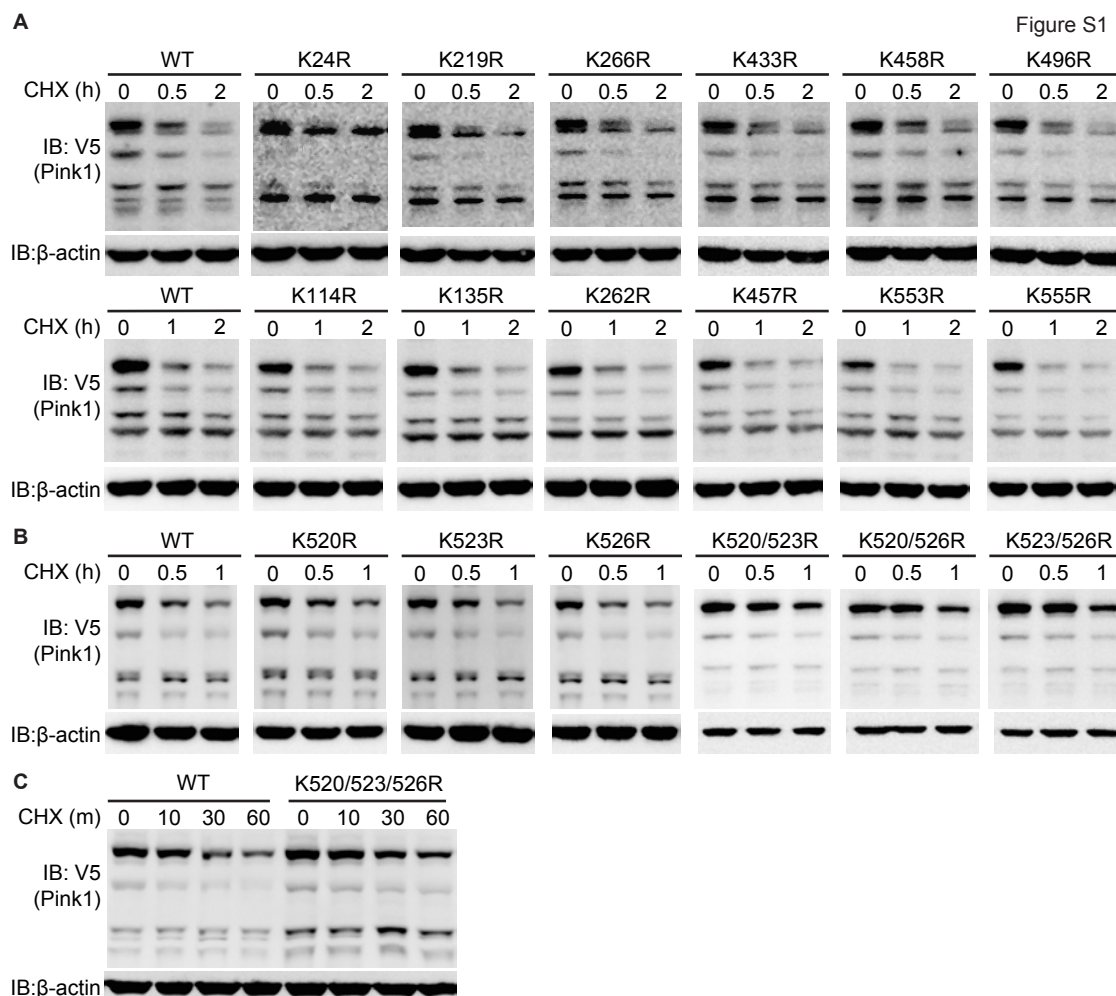

**Fig. S1. Identification of PINK1 ubiquitin acceptor sites.**

(A-C) Murine lung epithelia 12 (MLE12) cells were nucleofected with indicated single, double or triple lysine to arginine mutant plasmids and incubated for 48 h before the addition of CHX. Cells were collected at the indicated time points and cell lysates were subjected to immunoblotting analysis.

Table S1. Mass spectrometric analysis of PINK1 binding partners.

| Gene Name | Protein Name                                      | GFP PSM | PINK1-GFP PSM | Log2 Ratio (PINK1-GFP/GFP) |
|-----------|---------------------------------------------------|---------|---------------|----------------------------|
| MSH2      | mutS homolog 2, colon cancer, nonpolyposis type 1 | 0       | 24            | 5.614709844                |
| FBXO7     | F-box protein 7                                   | 0       | 7             | 3.906890596                |
| PTGES3    | prostaglandin E synthase 3                        | 0       | 7             | 3.906890596                |
| HSP90AA1  | heat shock 90kDa protein 1, alpha isoform 1       | 38      | 195           | 2.344238257                |
| CDK1      | cyclin-dependent kinase 1                         | 4       | 15            | 1.784271309                |

List of putative and previously described PINK1-interacting proteins identified by a label-free mass spectrometry screen of GFP and PINK1-GFP immunoprecipitation products. The peptide-spectral match (PSM) counts are shown, and the log<sub>2</sub> protein ratios calculated from normalized PSM counts. References for known direct or functional/genetic interactions confirmed in this screen include: (67); (26); (68); (69)

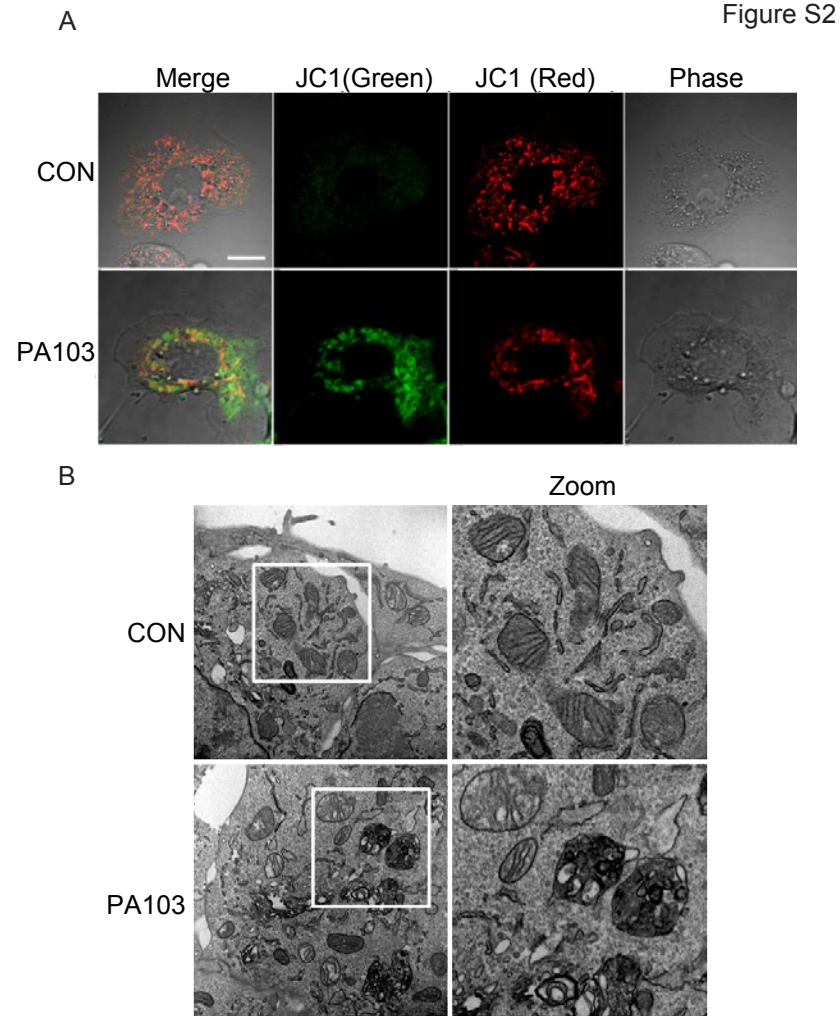

**Fig. S2. *P. aeruginosa* infection injures mitochondria.**

(A) BEAS-2B cells were exposed to a virulent strain of *P. aeruginosa* (PA103, multiplicity of infection (MOI=10)) for 90 min. The cells were then stained with JC1 (2  $\mu$ M) for additional 20 min before confocal microscopic analysis. (B) MLE12 cells were exposed to PA103 (MOI=10) for 8 h, cells were washed and fixed for transmission electron microscopy.

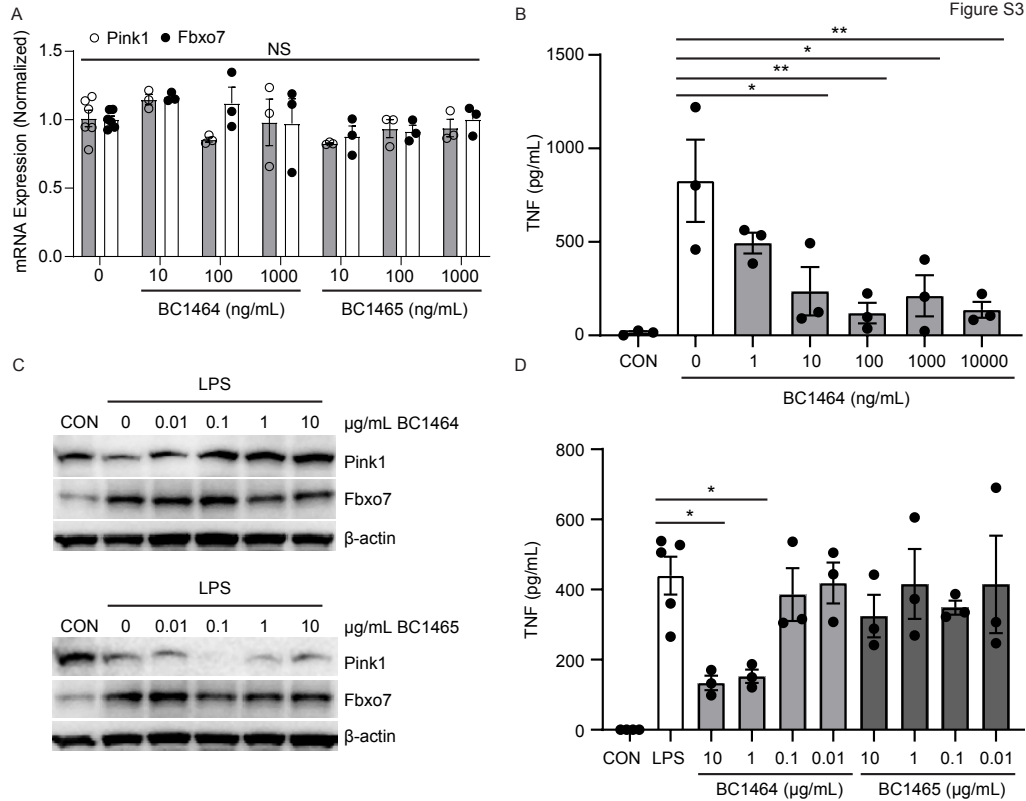

**Fig. S3. BC1464 preserves PINK1 protein and inhibits pro-inflammatory TNF- $\alpha$  release in vitro.** (A) MLE cells were incubated with BC1464 or BC1465 at indicated concentrations for 16 h. Steady-state mRNA was analyzed by quantitative real-time PCR using PINK1, Fbxo7 primers and normalized to GAPDH. Data and means  $\pm$  SEM (n=3-6) (B) PBMCs were pretreated with BC1464 at indicated concentrations for 2 h before an additional 4 h treatment with LPS (10ng/ml). TNF- $\alpha$  secretion was measured using an ELISA. Data and means  $\pm$  SEM (n=3) (C) Human lung slices were treated with BC1464 or BC1465 for 4 h at the indicated concentrations before they were challenged with LPS (100 ng/ml) for an additional 4 h. Lung slices were collected for immunoblotting and supernatant was collected for TNF- $\alpha$  ELISA analysis in (D). Data and means  $\pm$  SEM (n=3-5). NS,  $P > 0.05$ , \* $P < 0.05$ , \*\* $P < 0.01$ , as indicated by one-way ANOVA with Tukey's test of multiple comparisons (A-B,D).

Figure S4

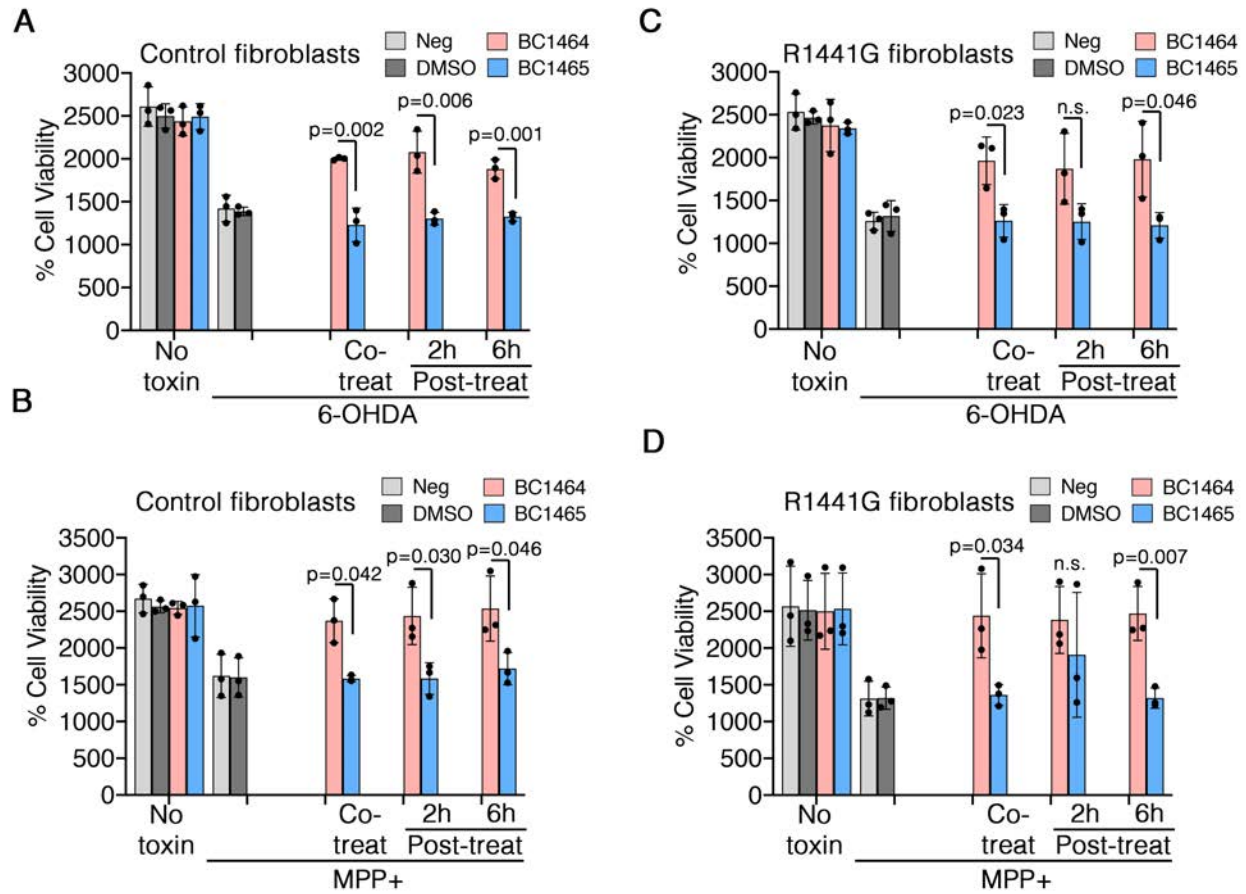

**Fig. S4. Delayed administration of BC1464 confers protection in patient fibroblasts.** Fibroblasts from control (A, B) and PD patient with the R1441G mutation (C, D) were treated with 6-OHDA (A,C) or MPP+ (B,D) as in Fig. 10. BC1464 or BC1465 (5  $\mu$ g/ml) were either coadministered or administered up to 6 h after toxin. Cell viability was assessed after 24 h of toxin exposure. (mean  $\pm$  SD, N=3 independent experiments, ANOVA-protected two-tailed t-test).
